# Supplementary material
Source: Springer Nature journal article supplement (https://www.springermedizin.de/resource/supplementary/12885_2013_4240_MOESM4_ESM.pdf/9465868)

**a** C666-1

IL-6

0 hr

4 hr

6 hr

BBR ( $\mu$ M)

0

50

0

50

0

50

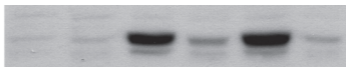

p-STAT 3

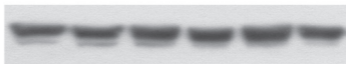

STAT 3

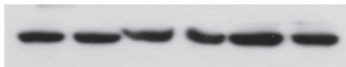 $\beta$ -actin**b** HK1

IL-6

0 hr

4 hr

6 hr

BBR ( $\mu$ M)

0

50

0

50

0

50

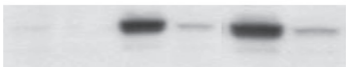

p-STAT 3

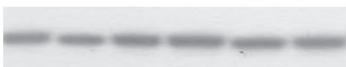

STAT 3

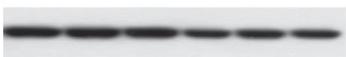 $\beta$ -actin

Supplement: MOESM4 [file 9465868]
